# Supplementary material for: Fragment Tree Reconciliation (FTR) for Space Applications
Source: Research Square preprint supplement (doi:10.21203/rs.3.rs-8855497/v1), 2026-02-13
Supplement: Supplementary file 1 [file db5e19e5786c48acd3b122d7.pdf]

# FTR: Fragment tree reconciliation - Supplements

Nico Domschke<sup>1†</sup>, Chen Wang<sup>2†</sup>, Richard Golnik<sup>1</sup>,  
Ales Charvat<sup>1</sup>, Anatolii Spesyvyi<sup>2,3</sup>, Thomas Gatter<sup>1\*</sup>,  
Bernd Abel<sup>2,3</sup>, Peter F. Stadler<sup>1,4-9\*</sup>

<sup>1</sup>Bioinformatics Group, Department of Computer Science &  
Interdisciplinary Center for Bioinformatics & School for Embedded and  
Composite Artificial Intelligence (SECAI), Leipzig University,  
Härtelstraße 16–18, D-04107 Leipzig, Germany.

<sup>2</sup>J. Heyrovský Institute of Physical Chemistry, Czech Academy of  
Sciences, Dolejškova 2155/3, CZ-18223 Praha, Czech Republic.

<sup>3</sup>Institute of Chemical Technology, Leipzig University, Linnestrasse 3,  
D-04103 Leipzig, Germany.

<sup>4</sup>Center for Scalable Data Analytics and Artificial Intelligence  
(ScaDS.AI), Leipzig University, D-04103 Leipzig, Germany.

<sup>5</sup>Max Planck Institute for Mathematics in the Sciences, Inselstraße 22,  
D-04103 Leipzig, Germany.

<sup>6</sup>Department of Theoretical Chemistry, University of Vienna,  
Währingerstraße 17, A-1090 Wien, Austria.

<sup>7</sup>Facultad de Ciencias, Universidad Nacional de Colombia, Bogotá,  
Colombia.

<sup>8</sup>Center for non-coding RNA in Technology and Health, University of  
Copenhagen, Ridebanevej 9, DK-1870 Frederiksberg, Denmark.

<sup>9</sup>Santa Fe Institute, 1399 Hyde Park Rd., Santa Fe, NM 87501, USA.

\*Corresponding author(s). E-mail(s): [thomas@bioinf.uni-leipzig.de](mailto:thomas@bioinf.uni-leipzig.de);  
[studla@bioinf.uni-leipzig.de](mailto:studla@bioinf.uni-leipzig.de);

Contributing authors: [dnico@bioinf.uni-leipzig.de](mailto:dnico@bioinf.uni-leipzig.de); [chen.wang@uni-leipzig.de](mailto:chen.wang@uni-leipzig.de);  
[richard@bioinf.uni-leipzig.de](mailto:richard@bioinf.uni-leipzig.de); [ales.charvat@uni-leipzig.de](mailto:ales.charvat@uni-leipzig.de);  
[anatolii.spesyvyi@jh-inst.cas.cz](mailto:anatolii.spesyvyi@jh-inst.cas.cz); [bernd.abel@uni-leipzig.de](mailto:bernd.abel@uni-leipzig.de);

<sup>†</sup>These authors contributed equally to this work.

# 31 1 Energy-dependent fragments

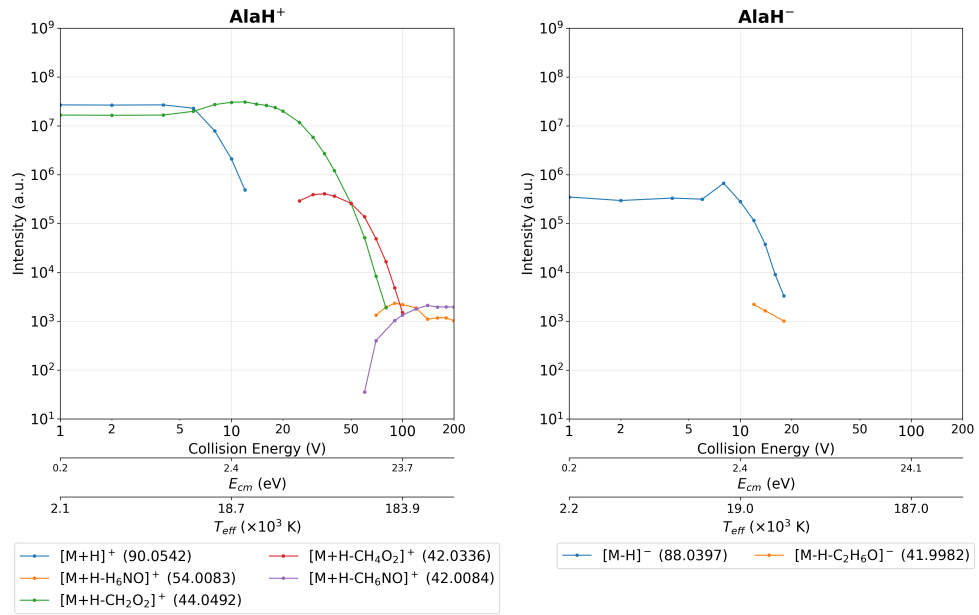

**Fig. 1:** Fragment emergence sampled over a collision energy range of 1 – 200V in both positive (left) and negative (right) modes for alanine.

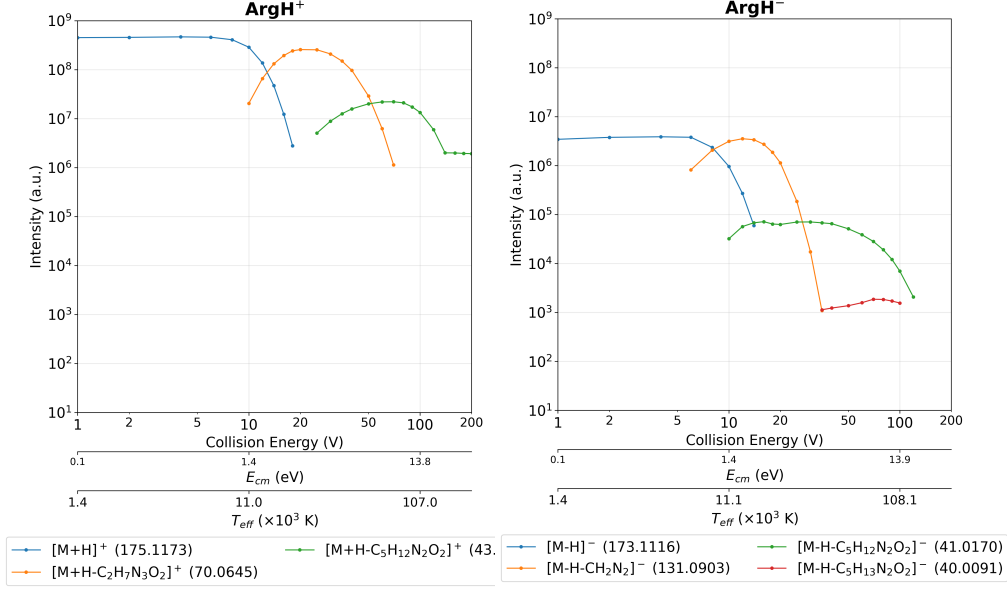

**Fig. 2:** Fragment emergence sampled over a collision energy range of 1 – 200V in both positive (left) and negative (right) modes for arginine.

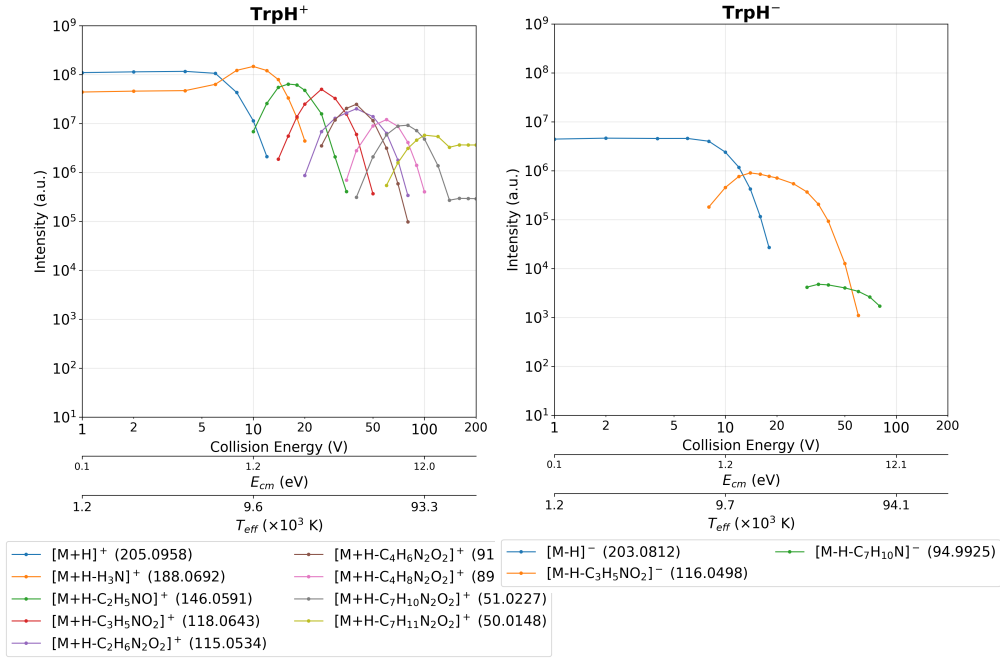

**Fig. 3:** Fragment emergence sampled over a collision energy range of 1 – 200V in both positive (left) and negative (right) modes for tryptophan.

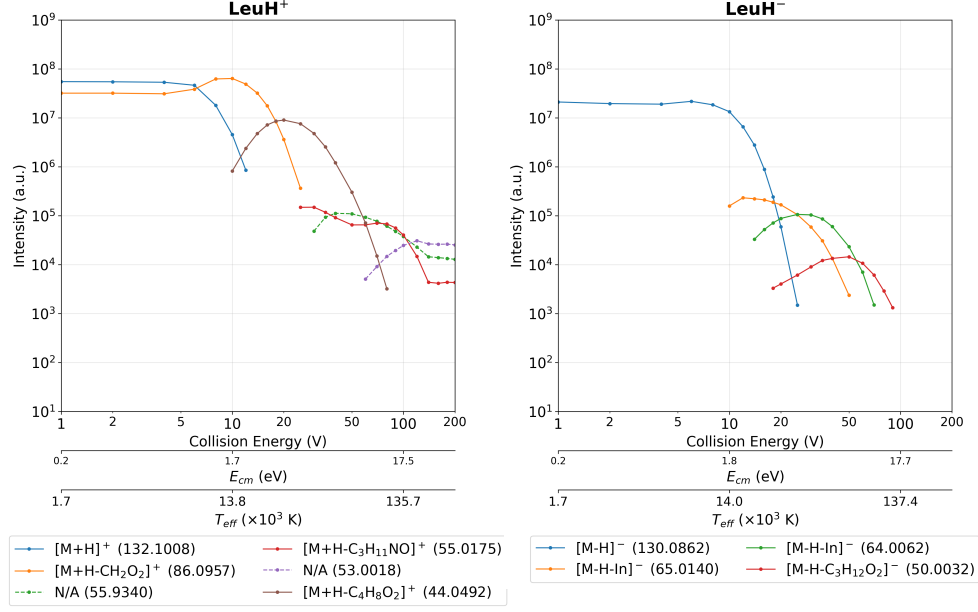

**Fig. 4:** Fragment emergence sampled over a collision energy range of 1 – 200V in both positive (left) and negative (right) modes for leucine.

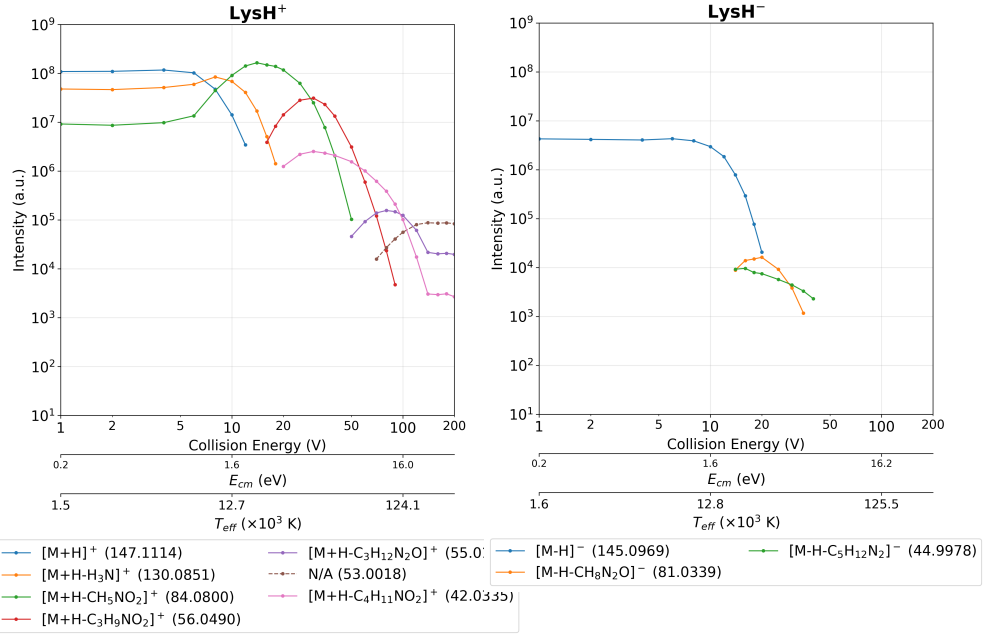

**Fig. 5:** Fragment emergence sampled over a collision energy range of 1 – 200V in both positive (left) and negative (right) modes for lysine.

## 2 Additional benchmarking figures for single first fragmentation events

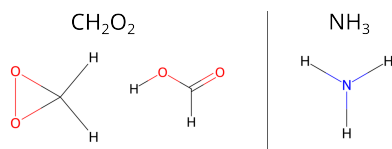

**Fig. 6:** Structural isomers of the neutral loss of leucine and alanine ( $\text{CH}_2\text{O}_2$ , left) and of arginine ( $\text{NH}_3$ , right). Due to the small difference in mass and thus a limited elemental composition, the losses only show very low variety. In order to save computation overhead for such small neutral losses, a dictionary containing commonly found neutral losses was used.

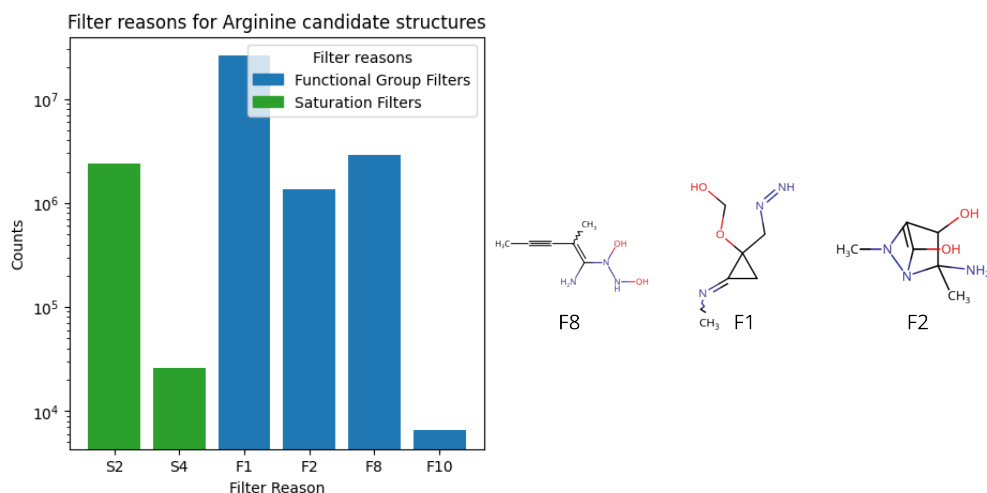

**Fig. 7: Left:** Reasons for discarding potential structure candidates for the primary descendant of arginine, i.e.  $\text{C}_6\text{H}_{11}\text{N}_3\text{O}_2$ , indicated by **s** for *unsaturation*, i.e. to filter for mostly unsaturated hydrocarbons, and **f** for any unstable, reactive, or synthetically infeasible functional group. In particular, **S2**: no unsaturations in 3-membered rings, **S4**: triple bond restrictions, **f1**: only one N or O next to an  $\text{sp}^3$  carbon or two oxygens if both oxygens are ring atoms, **f2**: maximal one N or O in small rings, **f8** (enol/enamine): removal of molecule if O or N atoms are adjacent to a non-aromatic  $\text{C}=\text{C}$ , **f10**: carbonic acids ( $\text{O}-\text{CO}_2\text{H}$ ), carbamic acids ( $\text{N}-\text{CO}_2\text{H}$ ), and  $\beta$ -carboxylic acid ( $(\text{C}=\text{O})-\text{C}-\text{CO}_2\text{H}$ ) are removed. For a complete overview see table 2 and table 3 full of [1]. **Right:** Example structures filtered by the GDB-17 set of SMART filters.

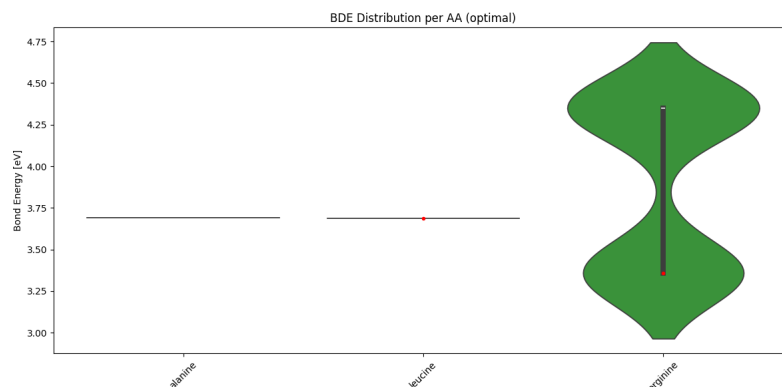

**Fig. 8:** Distribution of BDE values for all candidates of the first fragmentation reaction with optimal MCES score for alanine, leucine, and arginine. A red dot marks the reference reaction center size calculated for the literature proposed fragmentation. Alanine and leucine show a single energy value, as their structure only allows for one bond dissociation in their respective parent molecule. In the case of arginine, the lower BDE corresponds to the literature fragmentation.[2]

### 34 3 Annotated negative mode fragmentation trees

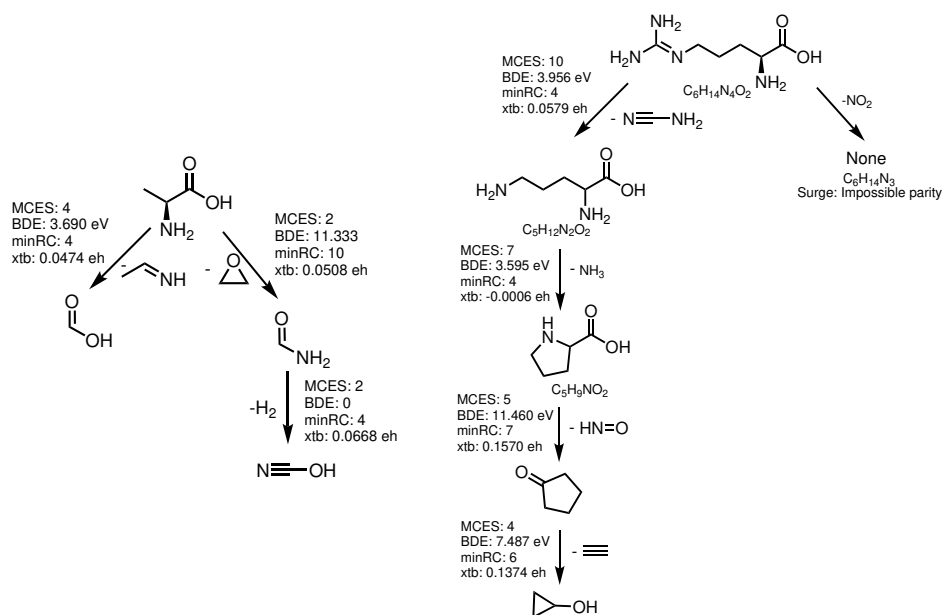

**Fig. 9:** Annotated fragmentation tree of alanine and arginine measured in negative ion mode.

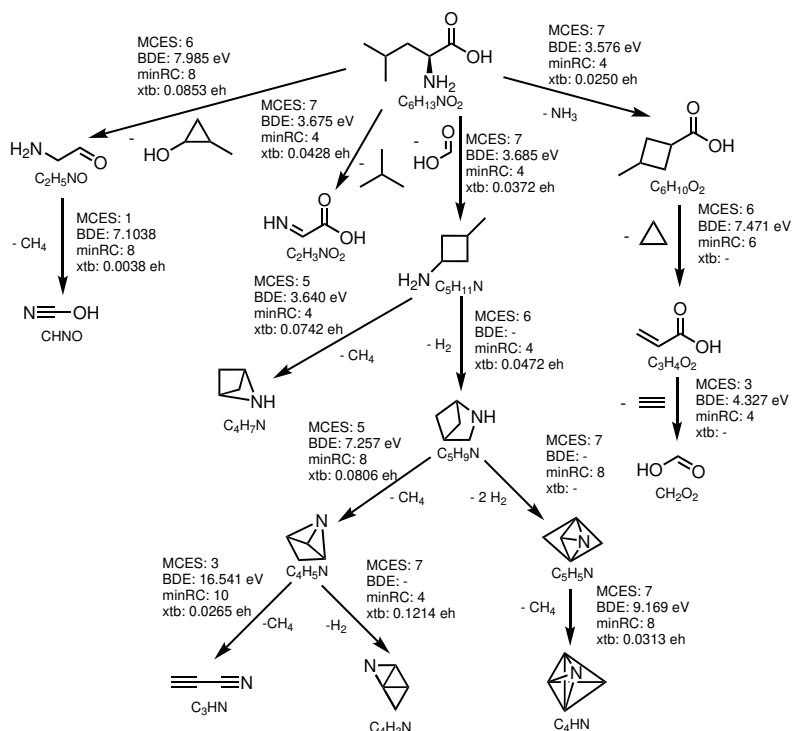

**Fig. 10:** Annotated fragmentation tree of leucine measured in negative ion mode.

## References

- [1] Ruddigkeit L, van Deursen R, Blum LC, Reymond JL (2012) Enumeration of 166 Billion Organic Small Molecules in the Chemical Universe Database GDB-17. *Journal of Chemical Information and Modeling* 52(11):2864-2875, DOI 10.1021/ci300415d
- [2] Zhang P, Chan W, Ang IL, Wei R, Lam MMT, Lei KMK, Poon TCW (2019) Revisiting Fragmentation Reactions of Protonated  $\alpha$ -Amino Acids by High-Resolution Electrospray Ionization Tandem Mass Spectrometry with Collision-Induced Dissociation. *Scientific Reports* 9(1):6453, DOI 10.1038/s41598-019-42777-8
